# Supplementary material
Source: PubMed Central journal article supplement (PMC9185512)
Supplement: jamaophthalmol-e221818-s00.pdf [file jamaophthalmol-e221818-s00.pdf]

## Data Sharing Statement

Christen. Efficacy of Marine  $\omega$ -3 Fatty Acid Supplementation vs Placebo in Reducing Incidence of Dry Eye Disease in Healthy US Adults. *JAMA Ophthalmol*. Published June 09, 2022. doi:10.1001/jamaophthalmol.2022.1818

### Data

**Data available:** Yes

**Data types:** Deidentified participant data

**How to access data:** A de-identified dataset will be made available within 2 years of publication. Please contact William Christen ([wchristen@rics.bwh.harvard.edu](mailto:wchristen@rics.bwh.harvard.edu))

**When available:** beginning date: 12-31-2024

### Supporting Documents

**Document types:** None

### Additional Information

**Who can access the data:** Anyone

**Types of analyses:** Any purpose

**Mechanisms of data availability:** Without investigator support

**Any additional restrictions:** None
