# Supplementary material
Source: PubMed Central journal article supplement (PMC9185512)
Supplement: jamaophthalmol-e221818-s002.pdf [file jamaophthalmol-e221818-s002.pdf]

\*First name, last name, and suffix (if applicable) are required and will appear in PubMed.

| <b>*Group Name(s): VITAL Research Group</b> |                   |                              |                  |                                                                                                 |                                          |                                                         |                                                                                            |
|---------------------------------------------|-------------------|------------------------------|------------------|-------------------------------------------------------------------------------------------------|------------------------------------------|---------------------------------------------------------|--------------------------------------------------------------------------------------------|
| <b>*First Name and Middle Initial(s)</b>    | <b>*Last Name</b> | <b>*Suffix (eg, Jr, III)</b> | Academic Degrees | Institution                                                                                     | Location (city, state/province, country) | Role or Contribution, eg, chair, principal investigator | Group (if more than 1 Group listed in the byline) and/or Subgroup (eg, Steering Committee) |
| JoAnn M.                                    | Manson            |                              | MD DrPH          | Brigham and Women's Hospital, Harvard Medical School, Harvard T.H Chan School of Public Health  | Boston, MA, USA                          | Chair, Steering Committee                               | VITAL Steering Committee                                                                   |
| Julie E.                                    | Buring            |                              | ScD              | Brigham and Women's Hospital, Harvard Medical School, Harvard T.H. Chan School of Public Health | Boston, MA, USA                          | Chair, Steering Committee                               | VITAL Steering Committee                                                                   |
| Nancy R.                                    | Cook              |                              | ScD              | Brigham and Women's Hospital, Harvard Medical School, Harvard T.H. Chan School of Public Health | Boston, MA, USA                          |                                                         | VITAL Steering Committee                                                                   |
| I-Min                                       | Lee               |                              | MBBs ScD         | Brigham and Women's Hospital, Harvard Medical School, Harvard T.H. Chan School of Public Health | Boston, MA, USA                          |                                                         | VITAL Steering Committee                                                                   |
| William G.                                  | Christen          |                              | ScD              | Brigham and Women's Hospital, Harvard Medical School                                            | Boston, MA, USA                          |                                                         | VITAL Steering Committee                                                                   |
| Shari S.                                    | Bassuk            |                              | ScD              | Brigham and Women's Hospital, Harvard Medical School                                            | Boston, MA, USA                          |                                                         | VITAL Steering Committee                                                                   |
| Samia                                       | Mora              |                              | MD MHS           | Brigham and Women's Hospital, Harvard Medical School                                            | Boston, MA, USA                          |                                                         | VITAL Steering Committee                                                                   |
| Heike                                       | Gibson            |                              | PhD              | Brigham and Women's Hospital, Harvard Medical School                                            | Boston, MA, USA                          |                                                         | VITAL Steering Committee                                                                   |
| David                                       | Gordon            |                              | MAT              | Brigham and Women's Hospital, Harvard Medical School                                            | Boston, MA, USA                          |                                                         | VITAL Steering Committee                                                                   |
| Trisha                                      | Copeland          |                              | MS RD            | Brigham and Women's Hospital, Harvard Medical School                                            | Boston, MA, USA                          |                                                         | VITAL Steering Committee                                                                   |
| Denise                                      | D'Agostino        |                              | BS               | Brigham and Women's Hospital, Harvard Medical School                                            | Boston, MA, USA                          |                                                         | VITAL Steering Committee                                                                   |
| Georgina                                    | Friedenberg       |                              | MPH              | Brigham and Women's Hospital, Harvard Medical School                                            | Boston, MA, USA                          |                                                         | VITAL Steering Committee                                                                   |

## Supplemental Online Content: Nonauthor Collaborators

\*First name, last name, and suffix (if applicable) are required and will appear in PubMed.

| *First Name and Middle Initial(s) | *Last Name  | *Suffix (eg, Jr, III) | Academic Degrees | Institution                                                                                     | Location (city, state/province, country) | Role or Contribution, eg, chair, principal investigator | Group (if more than 1 Group listed in the byline) and/or Subgroup (eg, Steering Committee) |
|-----------------------------------|-------------|-----------------------|------------------|-------------------------------------------------------------------------------------------------|------------------------------------------|---------------------------------------------------------|--------------------------------------------------------------------------------------------|
| Clair                             | Ridge       |                       | MPH              | Brigham and Women's Hospital, Harvard Medical School                                            | Boston, MA, USA                          |                                                         | VITAL Steering Committee                                                                   |
| Vadim                             | Bubes       |                       | PhD              | Brigham and Women's Hospital, Harvard Medical School                                            | Boston, MA, USA                          |                                                         | VITAL Steering Committee                                                                   |
| Edward L.                         | Giovannucci |                       | MD ScD           | Brigham and Women's Hospital, Harvard Medical School, Harvard T.H Chan School of Public Health  | Boston, MA, USA                          |                                                         | VITAL Steering Committee                                                                   |
| Walter C.                         | Willett     |                       | MD DrPH          | Brigham and Women's Hospital, Harvard Medical School, Harvard T.H. Chan School of Public Health | Boston, MA, USA                          |                                                         | VITAL Steering Committee                                                                   |
| John                              | Baron       |                       | MD MS<br>MSc     | University of North Carolina                                                                    | Chapel Hill, NC, USA                     | Scientific Consultant                                   |                                                                                            |
| Michael                           | Holick      |                       | MD PhD           | Boston Medical Center                                                                           | Boston, MA, USA                          | Scientific Consultant                                   |                                                                                            |
| Bruce                             | Hollis      |                       | PhD              | University of South Carolina                                                                    | Charleston, SC, USA                      | Scientific Consultant                                   |                                                                                            |
| Christine M.                      | Albert      |                       | MD MPH           | Brigham and Women's Hospital                                                                    | Boston, MA, USA                          |                                                         |                                                                                            |
| Diane                             | Gold        |                       | MD MPH           | Brigham and Women's Hospital                                                                    | Boston, MA, USA                          |                                                         |                                                                                            |
| Meryl                             | LeBoff      |                       | MD               | Brigham and Women's Hospital                                                                    | Boston, MA, USA                          |                                                         |                                                                                            |
| Olivia                            | Okereke     |                       | MD MS            | Brigham and Women's Hospital                                                                    | Boston, MA, USA                          |                                                         |                                                                                            |
| Aruna                             | Pradhan     |                       | MD MPH<br>MSc    | Brigham and Women's Hospital                                                                    | Boston, MA, USA                          |                                                         |                                                                                            |
| Howard                            | Sesso       |                       | ScD MPH          | Brigham and Women's Hospital                                                                    | Boston, MA, USA                          |                                                         |                                                                                            |
| Wendy                             | Chen        |                       | MD MPH           | Brigham and Women's Hospital                                                                    | Boston, MA, USA                          |                                                         |                                                                                            |
| Paulette                          | Chandler    |                       | MD MPH           | Brigham and Women's Hospital                                                                    | Boston, MA, USA                          |                                                         |                                                                                            |
| J. Michael                        | Gaziano     |                       | MD MPH           | Brigham and Women's Hospital                                                                    | Boston, MA, USA                          |                                                         |                                                                                            |
| Olga                              | Demler      |                       | PhD              | Brigham and Women's Hospital                                                                    | Boston, MA, USA                          |                                                         |                                                                                            |
| Kathryn                           | Rexrode     |                       | MD MPH           | Brigham and Women's Hospital                                                                    | Boston, MA, USA                          |                                                         |                                                                                            |
| Karen                             | Costenbader |                       | MD MPH           | Brigham and Women's Hospital                                                                    | Boston, MA, USA                          |                                                         |                                                                                            |
| John                              | Forman      |                       | MD               | Brigham and Women's Hospital                                                                    | Boston, MA, USA                          |                                                         |                                                                                            |
| Erik                              | Alexander   |                       | MD               | Brigham and Women's Hospital                                                                    | Boston, MA, USA                          |                                                         |                                                                                            |
| Sonia                             | Friedman    |                       | MD               | Brigham and Women's Hospital                                                                    | Boston, MA, USA                          |                                                         |                                                                                            |
| Jeffrey                           | Katz        |                       | MD MS            | Brigham and Women's Hospital                                                                    | Boston, MA, USA                          |                                                         |                                                                                            |

## Supplemental Online Content: Nonauthor Collaborators

\*First name, last name, and suffix (if applicable) are required and will appear in PubMed.

| *First Name and Middle Initial(s) | *Last Name      | *Suffix (eg, Jr, III) | Academic Degrees | Institution                  | Location (city, state/province, country) | Role or Contribution, eg, chair, principal investigator | Group (if more than 1 Group listed in the byline) and/or Subgroup (eg, Steering Committee) |
|-----------------------------------|-----------------|-----------------------|------------------|------------------------------|------------------------------------------|---------------------------------------------------------|--------------------------------------------------------------------------------------------|
| Shumin                            | Zhang           |                       | MS ScD           | Brigham and Women's Hospital | Boston, MA, USA                          |                                                         |                                                                                            |
| Jennifer                          | Lin             |                       | PhD              | Brigham and Women's Hospital | Boston, MA, USA                          |                                                         |                                                                                            |
| Joseph                            | Walter          |                       | BS               | Brigham and Women's Hospital | Boston, MA, USA                          |                                                         |                                                                                            |
| Julie                             | Duszlak         |                       | BS               | Brigham and Women's Hospital | Boston, MA, USA                          |                                                         |                                                                                            |
| Kate                              | Kalan           |                       | BS               | Brigham and Women's Hospital | Boston, MA, USA                          |                                                         |                                                                                            |
| Jean                              | MacFadyen       |                       | BA               | Brigham and Women's Hospital | Boston, MA, USA                          |                                                         |                                                                                            |
| Natalya                           | Gomelskaya      |                       | MD               | Brigham and Women's Hospital | Boston, MA, USA                          |                                                         |                                                                                            |
| David                             | Bates           |                       | BS               | Brigham and Women's Hospital | Boston, MA, USA                          |                                                         |                                                                                            |
| Ara                               | Sarkissian      |                       | MS               | Brigham and Women's Hospital | Boston, MA, USA                          |                                                         |                                                                                            |
| Mary                              | Breen           |                       |                  | Brigham and Women's Hospital | Boston, MA, USA                          |                                                         |                                                                                            |
| Yeulolani                         | Andrade         |                       |                  | Brigham and Women's Hospital | Boston, MA, USA                          |                                                         |                                                                                            |
| Manickavasagar                    | Vinayagamoorthy |                       | PhD              | Brigham and Women's Hospital | Boston, MA, USA                          |                                                         |                                                                                            |
| Chunying                          | Li              |                       | BM PhD           | Brigham and Women's Hospital | Boston, MA, USA                          |                                                         |                                                                                            |
| Eunjung                           | Kim             |                       | MS               | Brigham and Women's Hospital | Boston, MA, USA                          |                                                         |                                                                                            |
| Franco                            | Giulianini      |                       | BS MS PhD        | Brigham and Women's Hospital | Boston, MA, USA                          |                                                         |                                                                                            |
| Gregory                           | Kotler          |                       | PhD              | Brigham and Women's Hospital | Boston, MA, USA                          |                                                         |                                                                                            |
| Marty                             | Van Denburgh    |                       | BA               | Brigham and Women's Hospital | Boston, MA, USA                          |                                                         |                                                                                            |
| Rimma                             | Dushkes         |                       | MS               | Brigham and Women's Hospital | Boston, MA, USA                          |                                                         |                                                                                            |
| Yanyan                            | Liu             |                       | MS PhD           | Brigham and Women's Hospital | Boston, MA, USA                          |                                                         |                                                                                            |
| Eduardo                           | Pereira         |                       | MS               | Brigham and Women's Hospital | Boston, MA, USA                          |                                                         |                                                                                            |
| Lisa Fields                       | Johnson         |                       | BS               | Brigham and Women's Hospital | Boston, MA, USA                          |                                                         |                                                                                            |
| George                            | Menjin          |                       | AA               | Brigham and Women's Hospital | Boston, MA, USA                          |                                                         |                                                                                            |
| Lucy                              | Liu             |                       | BA               | Brigham and Women's Hospital | Boston, MA, USA                          |                                                         |                                                                                            |
| Lauren                            | Girard          |                       | BS               |                              |                                          |                                                         |                                                                                            |
| Scott                             | Zeller          |                       | MA PA            | Brigham and Women's Hospital | Boston, MA, USA                          |                                                         |                                                                                            |
| Naomi                             | Riches          |                       | BA MPH           | Brigham and Women's Hospital | Boston, MA, USA                          |                                                         |                                                                                            |
| Katelyn                           | Hasson          |                       | BS               | Brigham and Women's Hospital | Boston, MA, USA                          |                                                         |                                                                                            |
| Ellen                             | Bhang           |                       | BA MSW           | Brigham and Women's Hospital | Boston, MA, USA                          |                                                         |                                                                                            |
| Maria                             | Revilla         |                       | BS               | Brigham and Women's Hospital | Boston, MA, USA                          |                                                         |                                                                                            |

## Supplemental Online Content: Nonauthor Collaborators

\*First name, last name, and suffix (if applicable) are required and will appear in PubMed.

| *First Name and Middle Initial(s) | *Last Name      | *Suffix (eg, Jr, III) | Academic Degrees | Institution                  | Location (city, state/province, country) | Role or Contribution, eg, chair, principal investigator | Group (if more than 1 Group listed in the byline) and/or Subgroup (eg, Steering Committee) |
|-----------------------------------|-----------------|-----------------------|------------------|------------------------------|------------------------------------------|---------------------------------------------------------|--------------------------------------------------------------------------------------------|
| Elena                             | McCarthy        |                       | BS               | Brigham and Women's Hospital | Boston, MA, USA                          |                                                         |                                                                                            |
| Alex                              | Moran           |                       | BS               | Brigham and Women's Hospital | Boston, MA, USA                          |                                                         |                                                                                            |
| Kristen                           | Halse           |                       |                  | Brigham and Women's Hospital | Boston, MA, USA                          |                                                         |                                                                                            |
| Leah                              | Arsenault       |                       | BA               | Brigham and Women's Hospital | Boston, MA, USA                          |                                                         |                                                                                            |
| Philomena                         | Quinn           |                       |                  | Brigham and Women's Hospital | Boston, MA, USA                          |                                                         |                                                                                            |
| Sancia                            | Grimes          |                       |                  | Brigham and Women's Hospital | Boston, MA, USA                          |                                                         |                                                                                            |
| Ivan                              | Fitchorov       |                       | MS PhD           | Brigham and Women's Hospital | Boston, MA, USA                          |                                                         |                                                                                            |
| Kurt                              | Schwerin        |                       | BA               | Brigham and Women's Hospital | Boston, MA, USA                          |                                                         |                                                                                            |
| Shamikhah                         | Curry           |                       |                  | Brigham and Women's Hospital | Boston, MA, USA                          |                                                         |                                                                                            |
| Annie                             | Murray          |                       |                  | Brigham and Women's Hospital | Boston, MA, USA                          |                                                         |                                                                                            |
| Angela                            | Zhang           |                       |                  | Brigham and Women's Hospital | Boston, MA, USA                          |                                                         |                                                                                            |
| Diana                             | Walron-Williams |                       |                  | Brigham and Women's Hospital | Boston, MA, USA                          |                                                         |                                                                                            |
| Alison                            | Weinberg        |                       | MA               | Brigham and Women's Hospital | Boston, MA, USA                          |                                                         |                                                                                            |
| Chris                             | Pfeffer         |                       | BS               | Brigham and Women's Hospital | Boston, MA, USA                          |                                                         |                                                                                            |
| Margaret                          | Haubourg        |                       |                  | Brigham and Women's Hospital | Boston, MA, USA                          |                                                         |                                                                                            |
| Viviane                           | Nguyen          |                       | BS               | Brigham and Women's Hospital | Boston, MA, USA                          |                                                         |                                                                                            |
| Henry                             | Ouellette       |                       |                  | Brigham and Women's Hospital | Boston, MA, USA                          |                                                         |                                                                                            |
| Rolando                           | Rodriguez       |                       |                  | Brigham and Women's Hospital | Boston, MA, USA                          |                                                         |                                                                                            |
| Tony                              | Montgomery      |                       |                  | Brigham and Women's Hospital | Boston, MA, USA                          |                                                         |                                                                                            |
| Keith                             | Morse           |                       |                  | Brigham and Women's Hospital | Boston, MA, USA                          |                                                         |                                                                                            |
| Vincent                           | Guzman          |                       |                  | Brigham and Women's Hospital | Boston, MA, USA                          |                                                         |                                                                                            |
| Megan                             | Perry           |                       | BA               | Brigham and Women's Hospital | Boston, MA, USA                          |                                                         |                                                                                            |
| Sandra                            | Weekes          |                       |                  | Brigham and Women's Hospital | Boston, MA, USA                          |                                                         |                                                                                            |
| Doug                              | Smith           |                       | BS               | Brigham and Women's Hospital | Boston, MA, USA                          |                                                         |                                                                                            |
| Allison                           | Clar            |                       | BS               | Brigham and Women's Hospital | Boston, MA, USA                          |                                                         |                                                                                            |
| Sara                              | Curran          |                       | BS               | Brigham and Women's Hospital | Boston, MA, USA                          |                                                         |                                                                                            |
| Yaneve                            | Fonge           |                       | BSc              | Brigham and Women's Hospital | Boston, MA, USA                          |                                                         |                                                                                            |
| David                             | Hibbert         |                       | BA               | Brigham and Women's Hospital | Boston, MA, USA                          |                                                         |                                                                                            |
| Louisa                            | Paine           |                       | BA               | Brigham and Women's Hospital | Boston, MA, USA                          |                                                         |                                                                                            |
| Kelly                             | Royce           |                       | BS               | Brigham and Women's Hospital | Boston, MA, USA                          |                                                         |                                                                                            |

## Supplemental Online Content: Nonauthor Collaborators

\*First name, last name, and suffix (if applicable) are required and will appear in PubMed.

| *First Name and Middle Initial(s) | *Last Name | *Suffix (eg, Jr, III) | Academic Degrees | Institution                    | Location (city, state/province, country) | Role or Contribution, eg, chair, principal investigator | Group (if more than 1 Group listed in the byline) and/or Subgroup (eg, Steering Committee) |
|-----------------------------------|------------|-----------------------|------------------|--------------------------------|------------------------------------------|---------------------------------------------------------|--------------------------------------------------------------------------------------------|
| Courtney                          | Splaine    |                       | BA               | Brigham and Women's Hospital   | Boston, MA, USA                          |                                                         |                                                                                            |
| Jennifer                          | McMahon    |                       |                  | Brigham and Women's Hospital   | Boston, MA, USA                          |                                                         |                                                                                            |
| David                             | Eldridge   |                       | BA               | Brigham and Women's Hospital   | Boston, MA, USA                          |                                                         |                                                                                            |
| Laura                             | Hand       |                       | BA               | Brigham and Women's Hospital   | Boston, MA, USA                          |                                                         |                                                                                            |
| Kay                               | Inandan    |                       | BS               | Brigham and Women's Hospital   | Boston, MA, USA                          |                                                         |                                                                                            |
| Meghan                            | RieuWerden |                       | BS               | Brigham and Women's Hospital   | Boston, MA, USA                          |                                                         |                                                                                            |
| Harriet                           | Samuelson  |                       | MA               | Brigham and Women's Hospital   | Boston, MA, USA                          |                                                         |                                                                                            |
| Andrea                            | Hrbek      |                       |                  | Brigham and Women's Hospital   | Boston, MA, USA                          |                                                         |                                                                                            |
| Megan                             | Mele       |                       | BS               | Brigham and Women's Hospital   | Boston, MA, USA                          |                                                         |                                                                                            |
| Eileen                            | Bowes      |                       |                  | Brigham and Women's Hospital   | Boston, MA, USA                          |                                                         |                                                                                            |
| Mary Anne                         | Ryan       |                       | BA               | Massachusetts General Hospital | Boston, MA, USA                          |                                                         |                                                                                            |
| Carlos                            | Camargo    |                       | MD DrPH          | Brigham and Women's Hospital   | Boston, MA, USA                          |                                                         |                                                                                            |
| Jacqueline                        | Danik      |                       | MD DrPH          | Brigham and Women's Hospital   | Boston, MA, USA                          |                                                         |                                                                                            |
| Ravi                              | Thadhani   |                       | MD MPH           | Vanderbilt University          | Nashville, TN, USA                       |                                                         |                                                                                            |
| Thomas                            | Wang       |                       | MD               | Rush University Medical Center | Chicago, IL, USA                         |                                                         |                                                                                            |
| Raj C.                            | Shah       |                       | MD               | University of California       | San Francisco, CA, USA                   |                                                         |                                                                                            |
| Michelle A.                       | Albert     |                       | MD MPH           | Brigham and Women's Hospital   | Boston, MA, USA                          |                                                         |                                                                                            |
